# Supplementary material for: Intramolecular Phosphine-Promoted Knoevenagel Based Redox-Reaction
Source: MDPI journal article supplement (doi:10.3390/molecules27154875), 2022-07-29

# Supporting Information

## Intramolecular Phosphine-promoted Knoevenagel based Redox-Reaction

N. Feuge<sup>1</sup>, J. C. Namyslo<sup>1</sup>, D. E. Kaufmann<sup>1</sup>, R. Wilhelm<sup>\*1</sup>

Address: <sup>1</sup>Institute of Organic Chemistry, Clausthal University of Technology,  
Leibnizstrasse 6, D-38678 Clausthal-Zellerfeld, Germany

Email: rene.wilhelm@tu-clausthal.de

\* Corresponding author

### Content

<sup>1</sup>H, <sup>13</sup>C, <sup>31</sup>P NMR and ESI-HRMS Spectra

S2-S13

## Spectra of 3a:

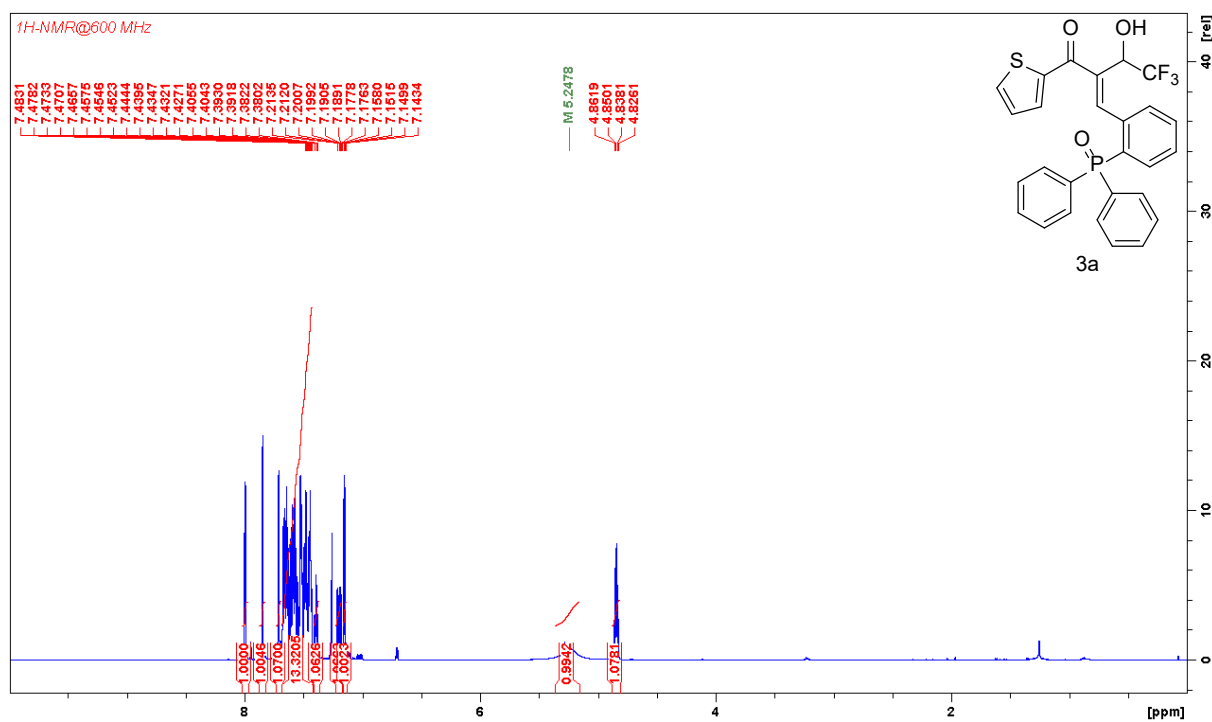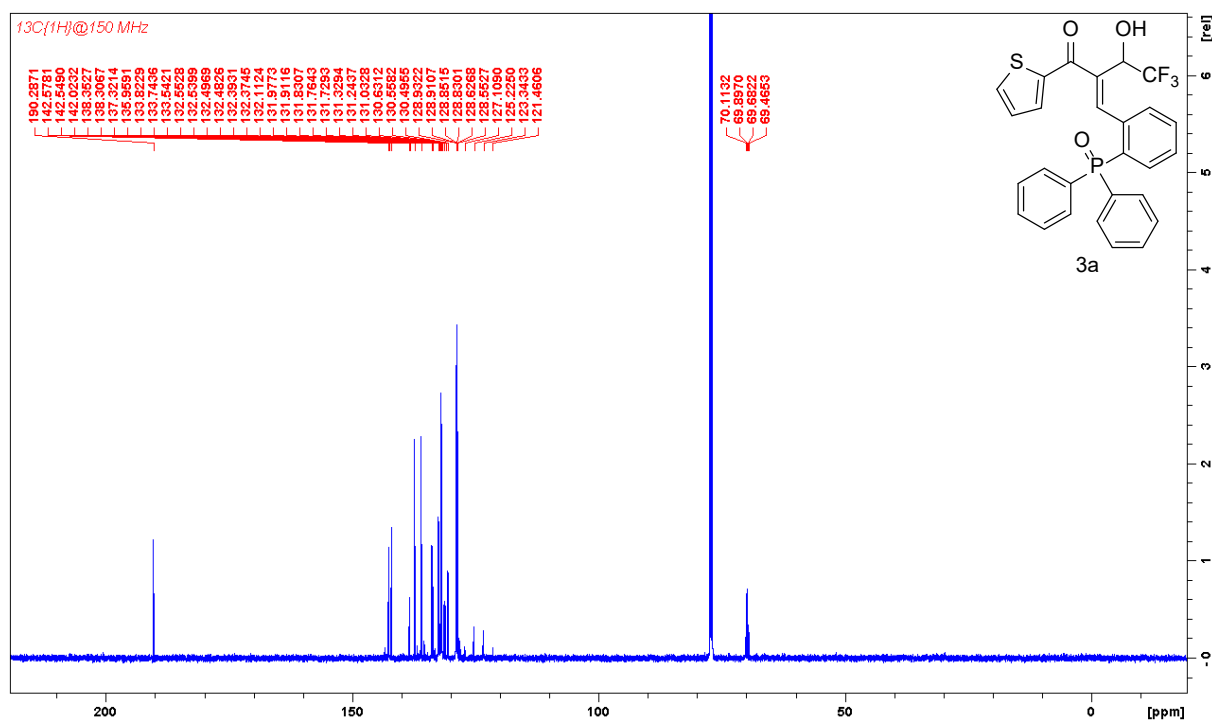

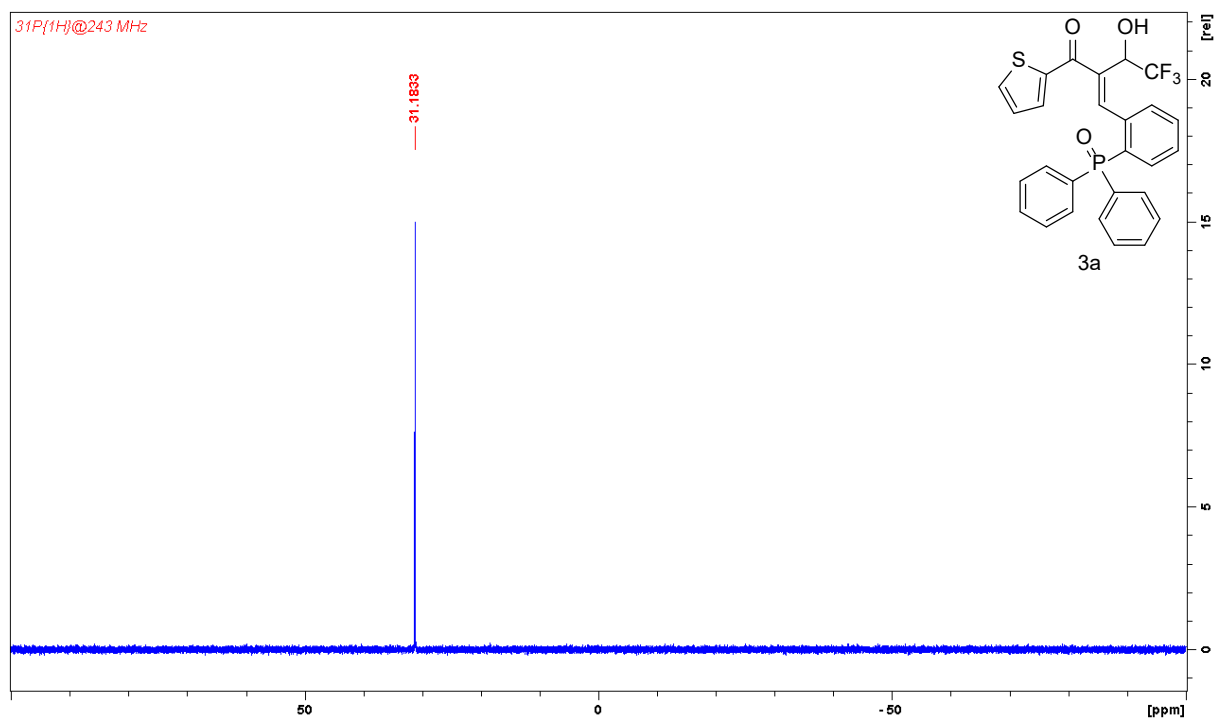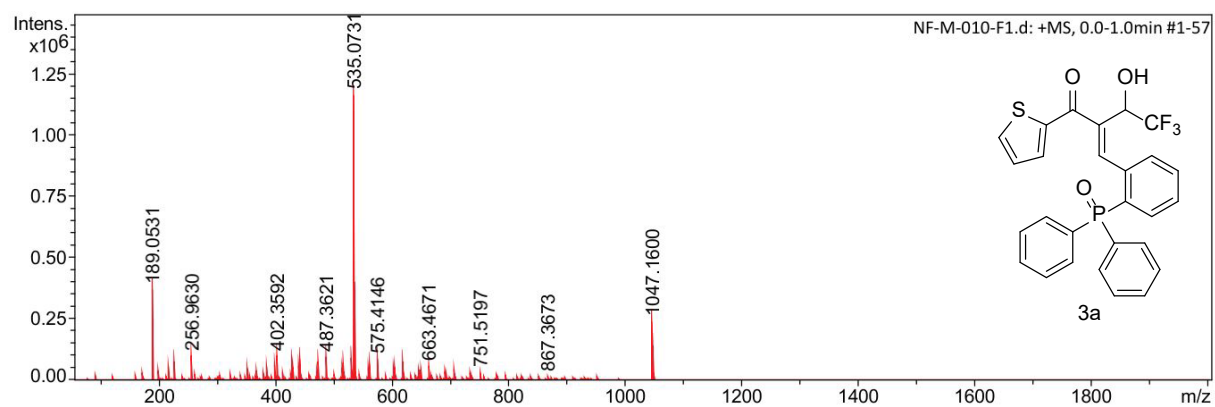

# Spectra of 3b:

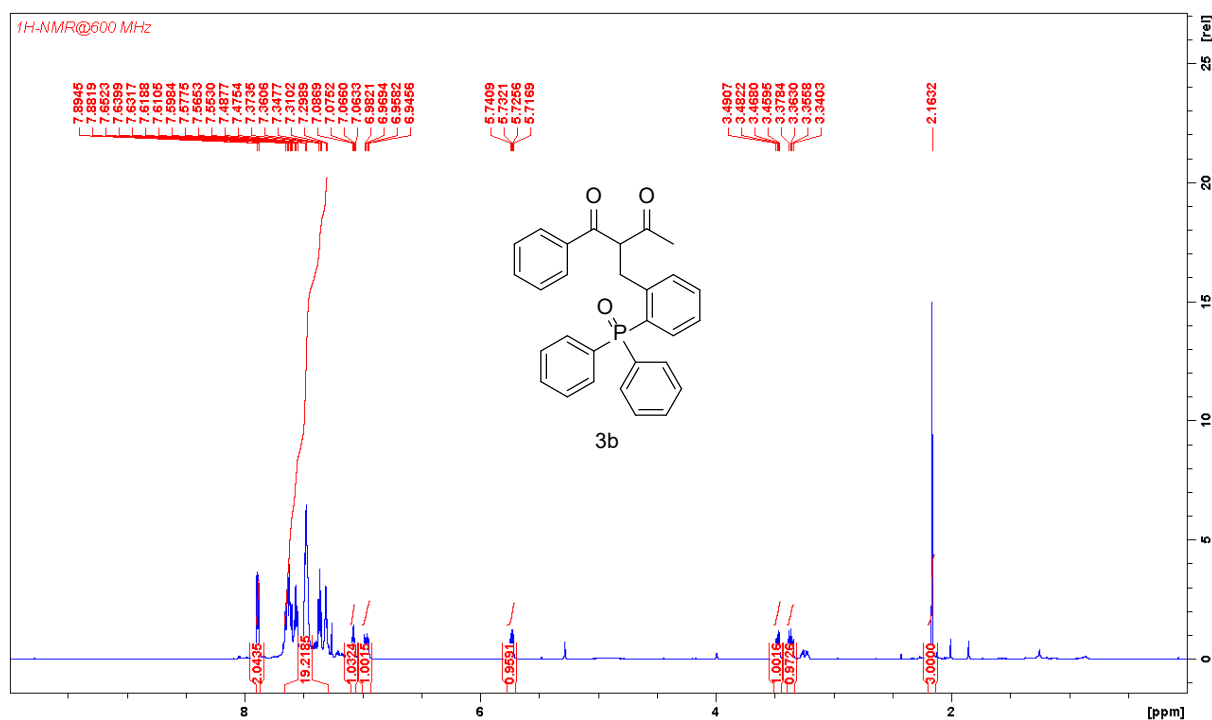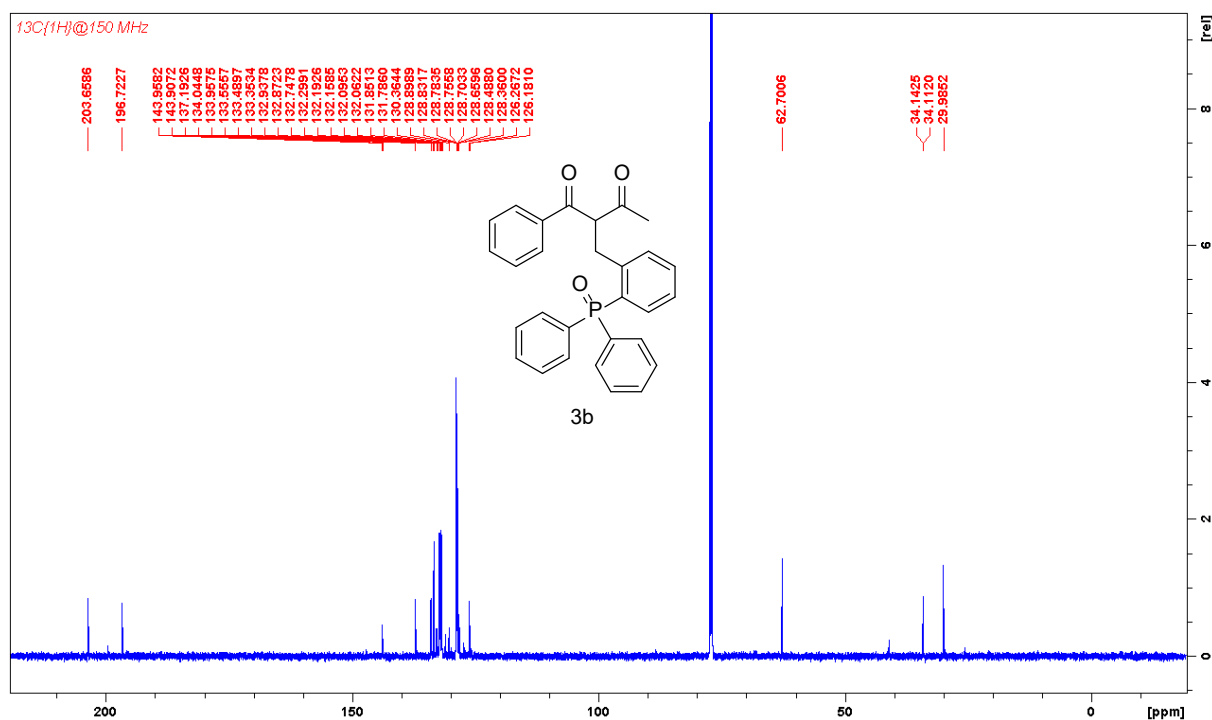

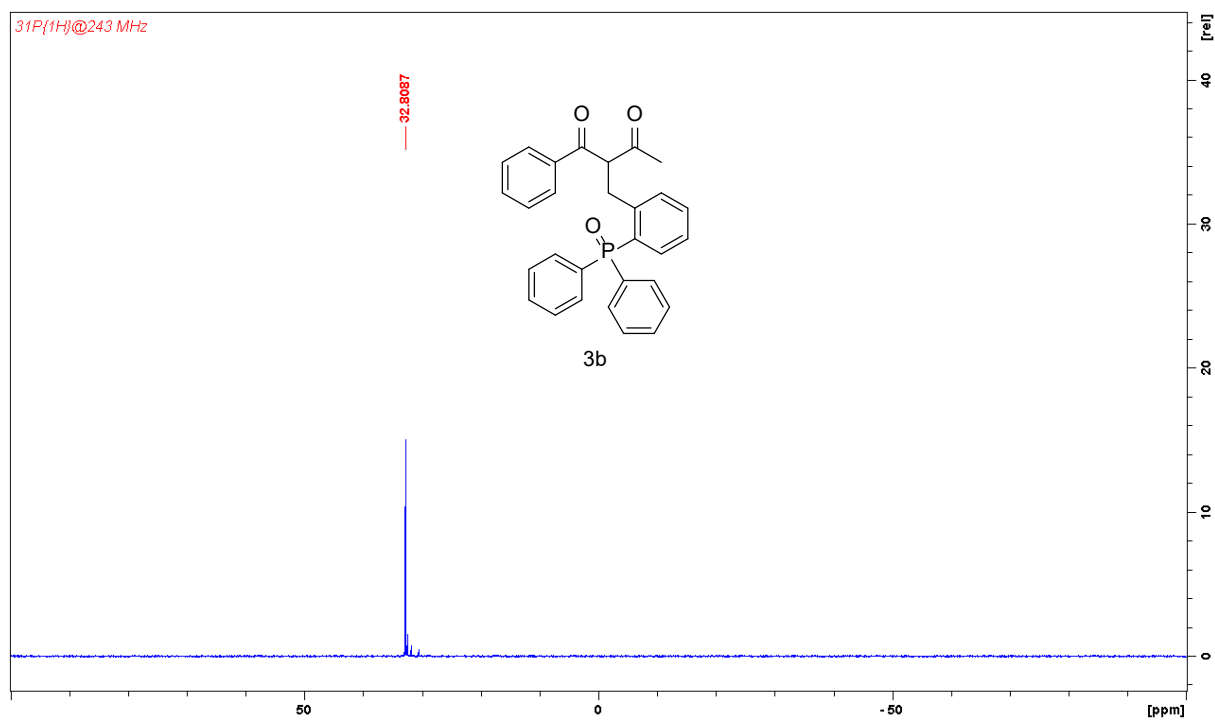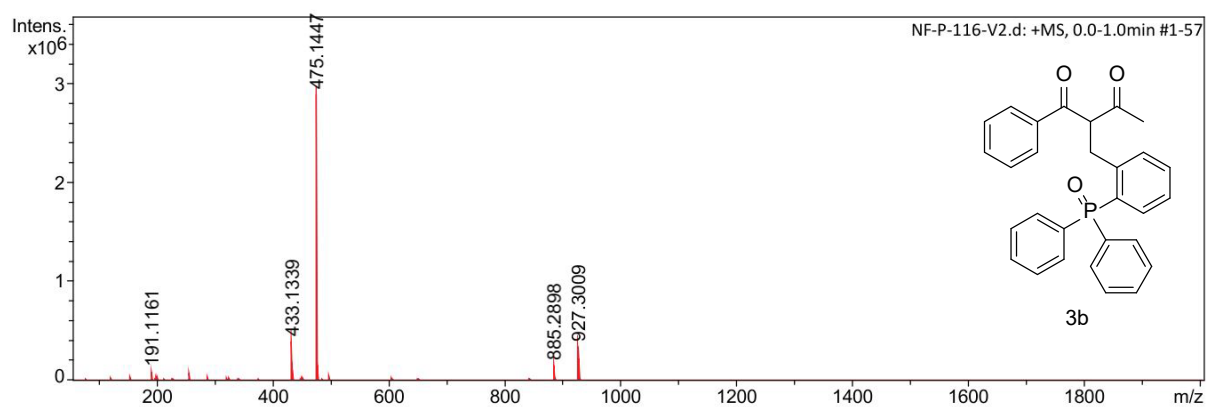

# Spectra of 3c:

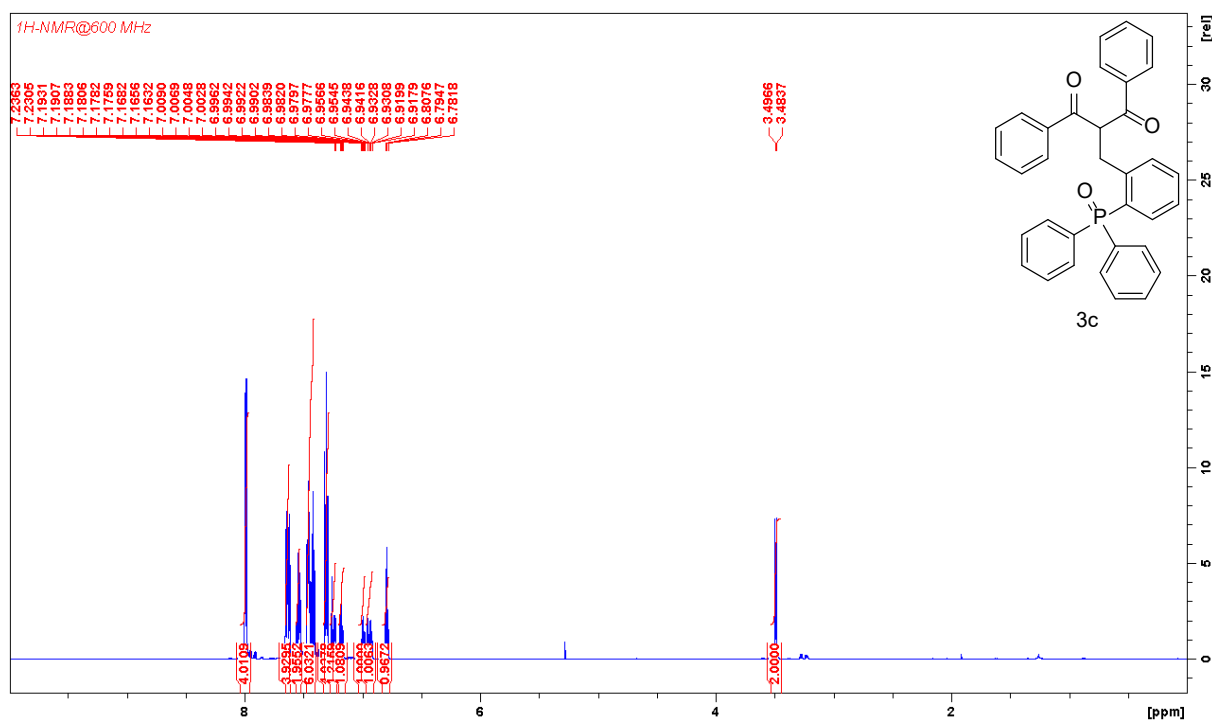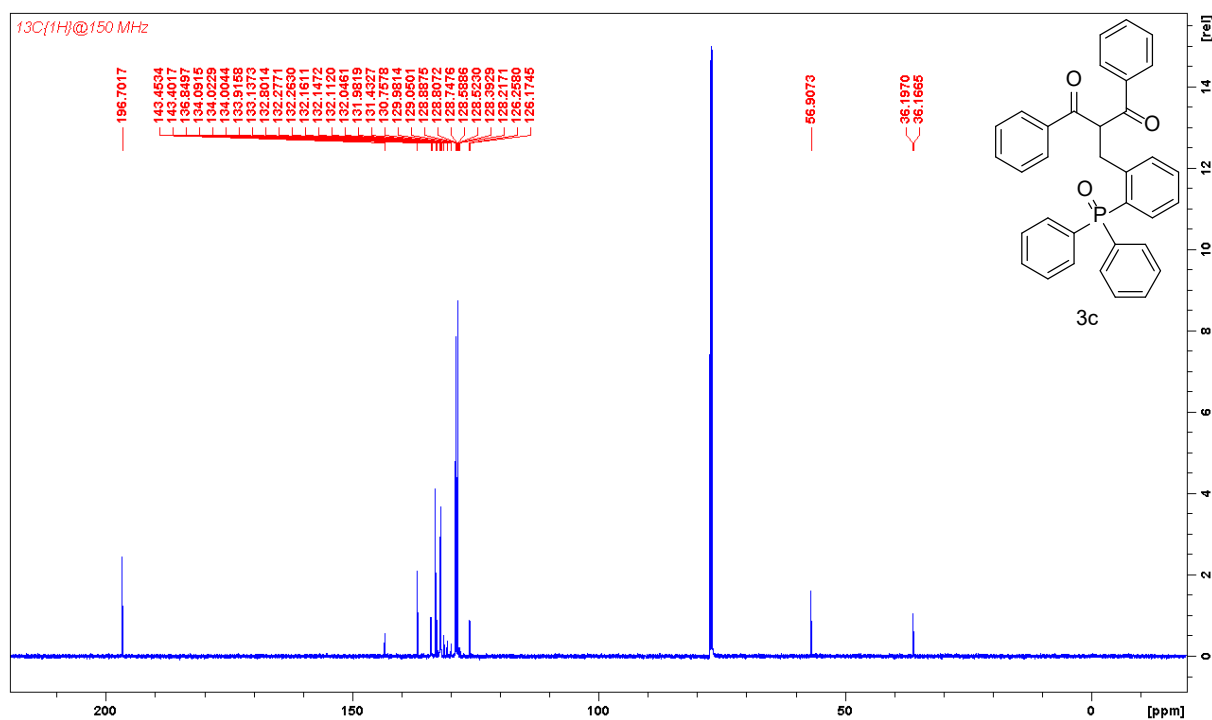

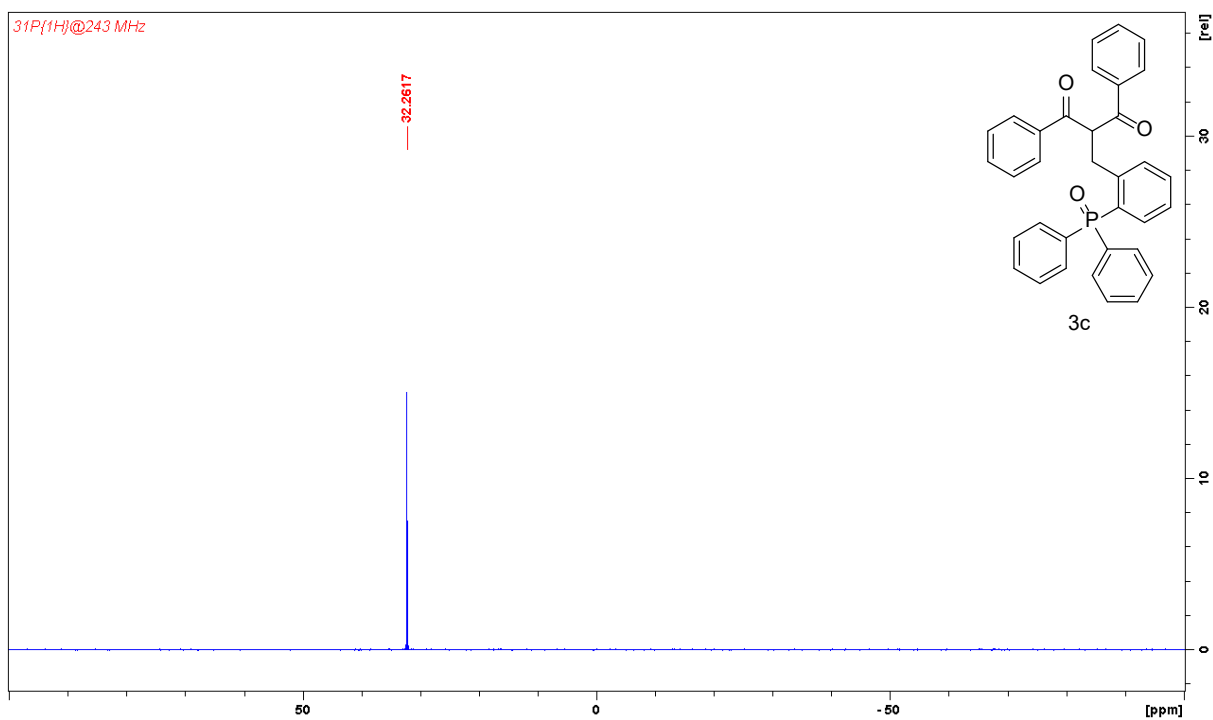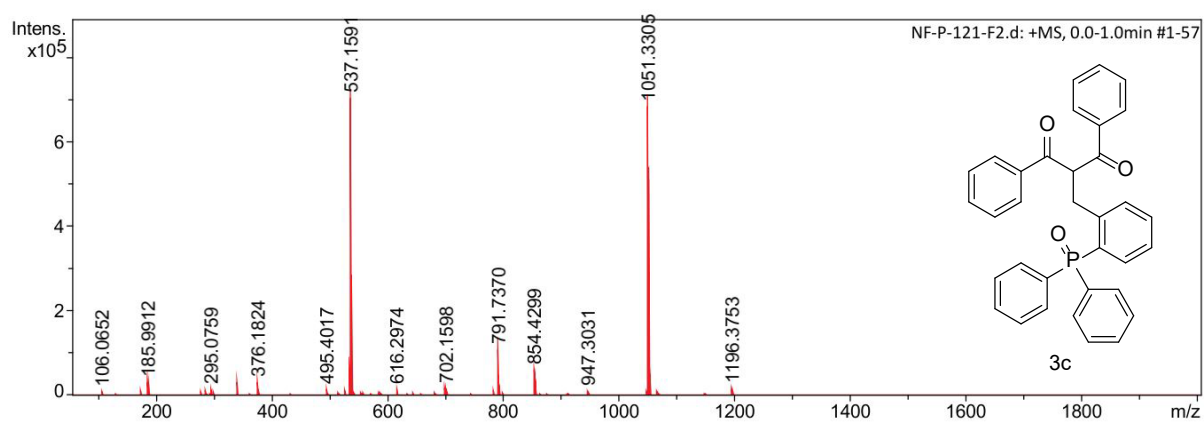

# Spectra of 3d:

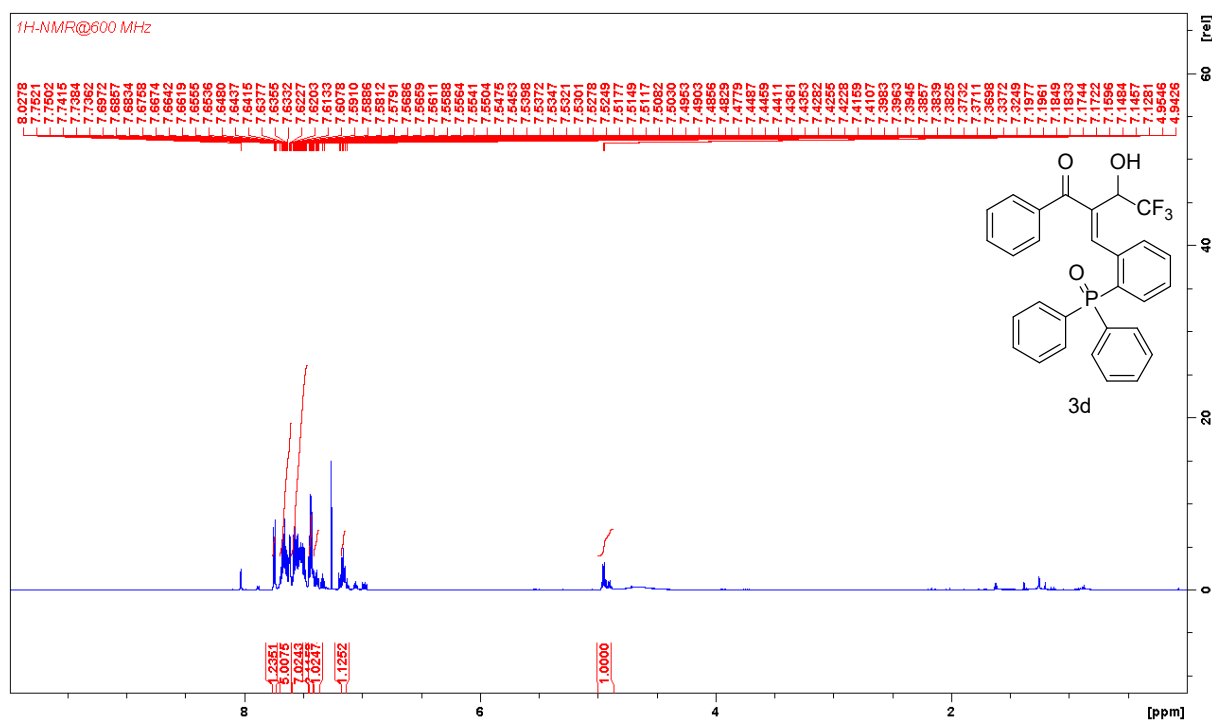



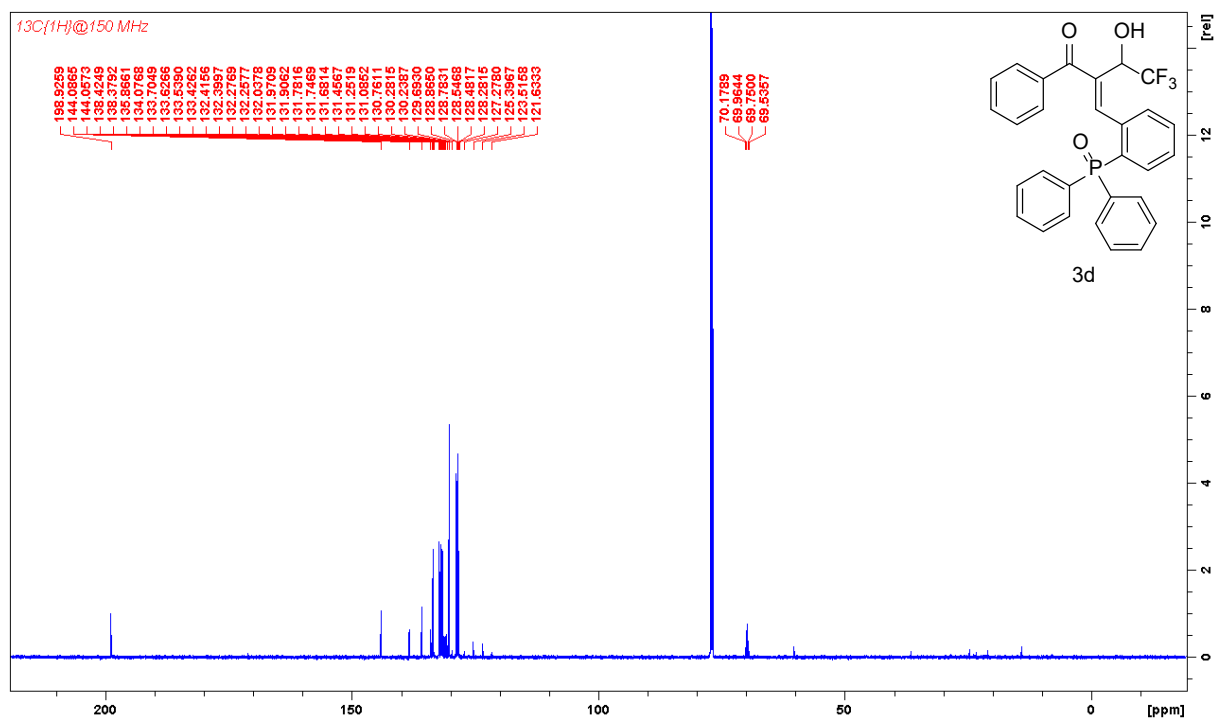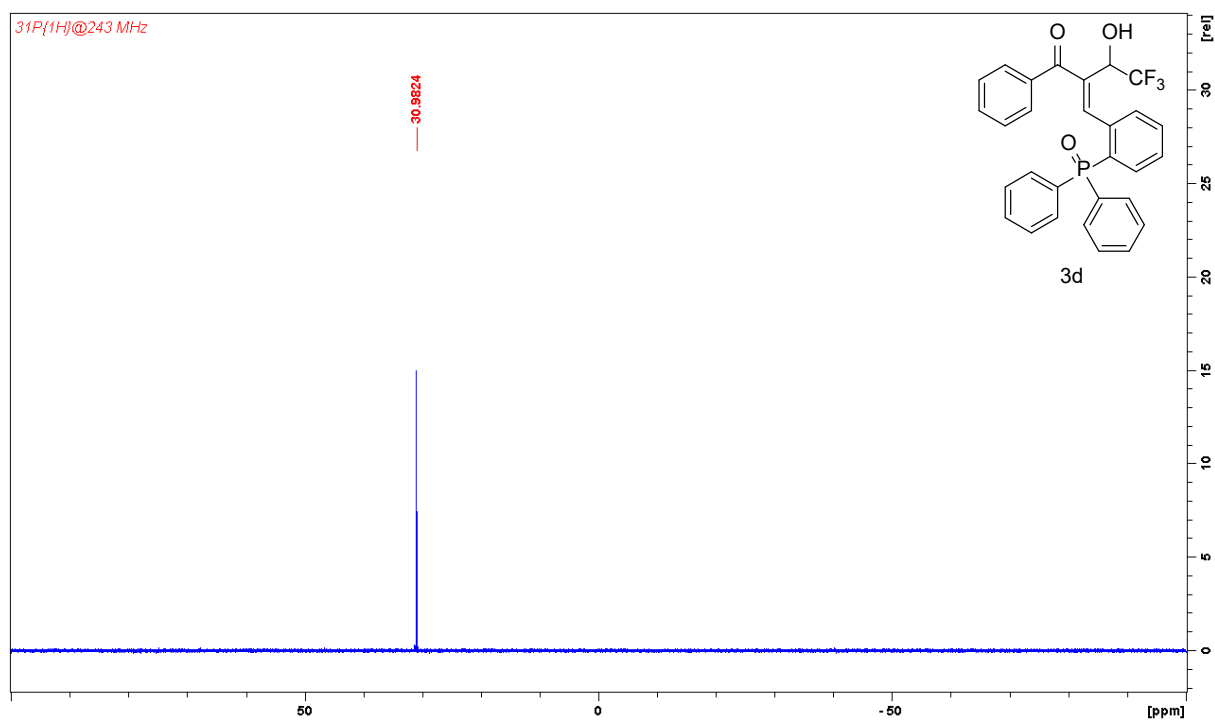

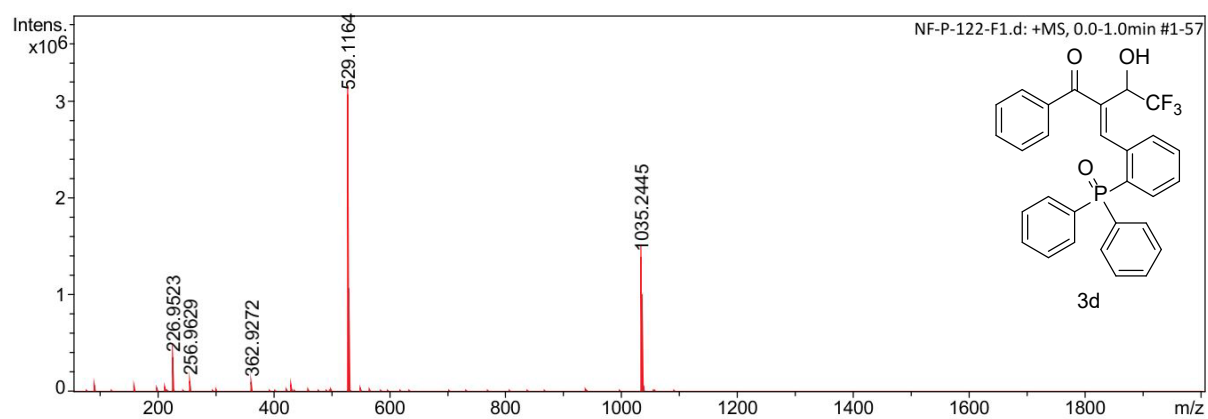

# Spectra of 6:

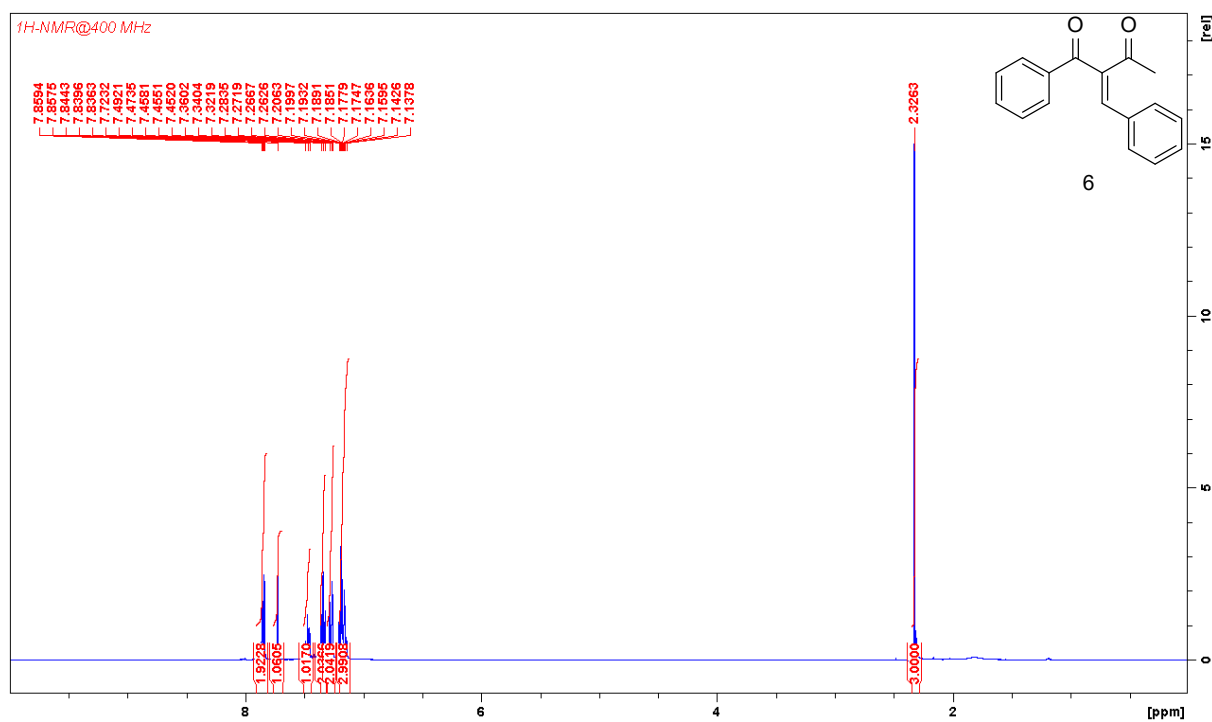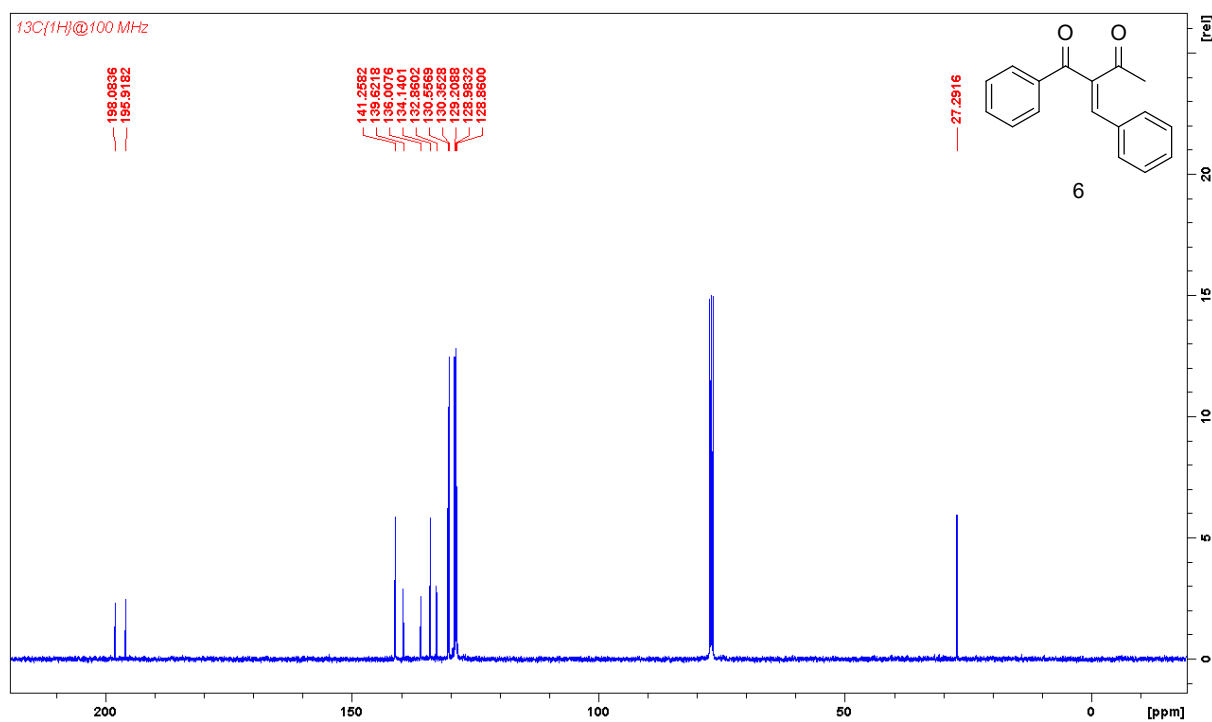

# Spectra of 7:

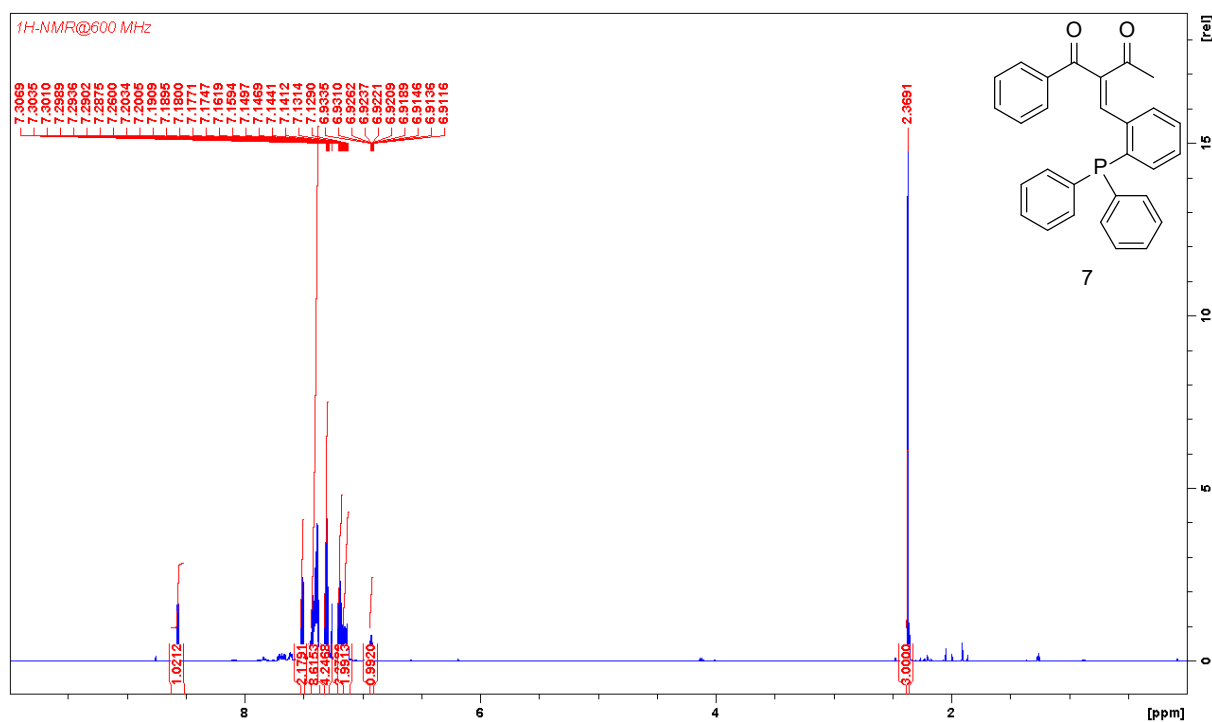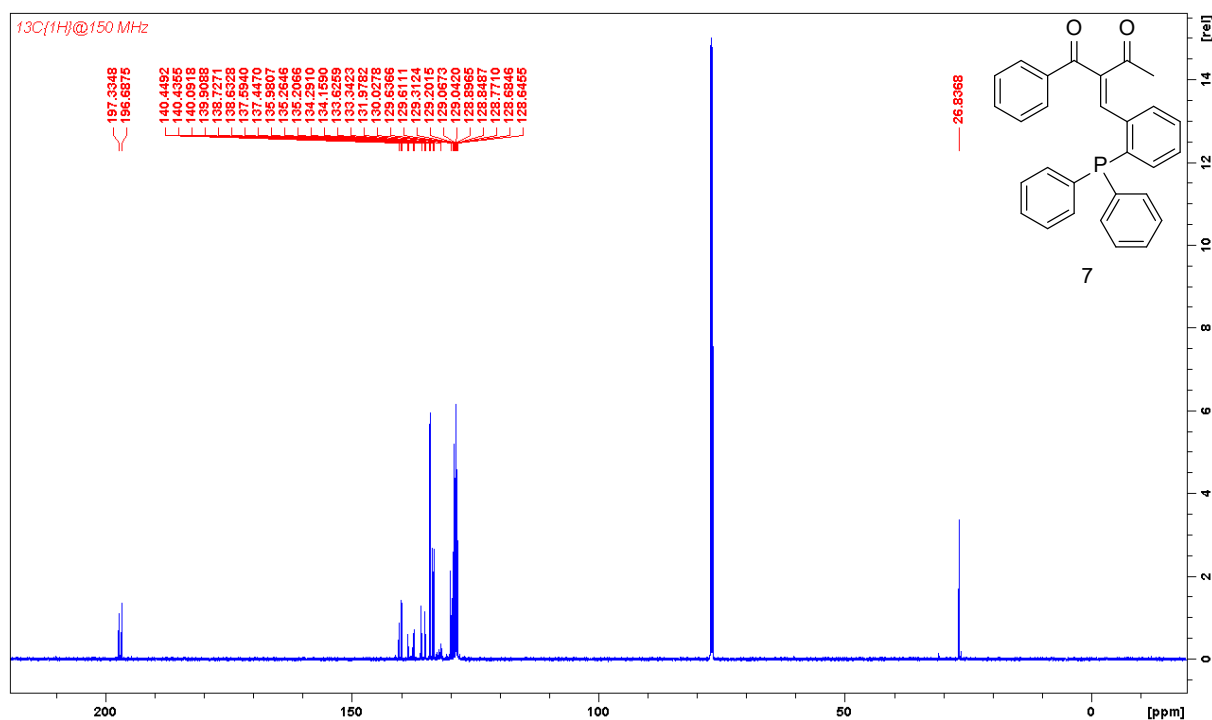

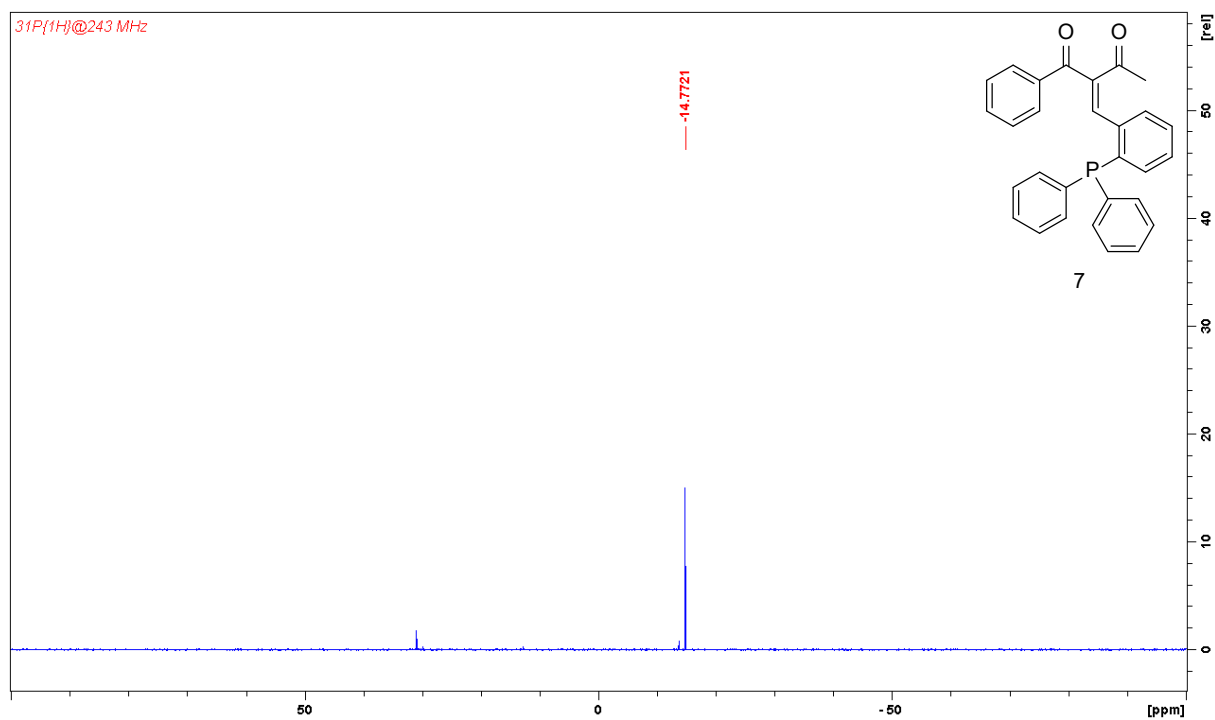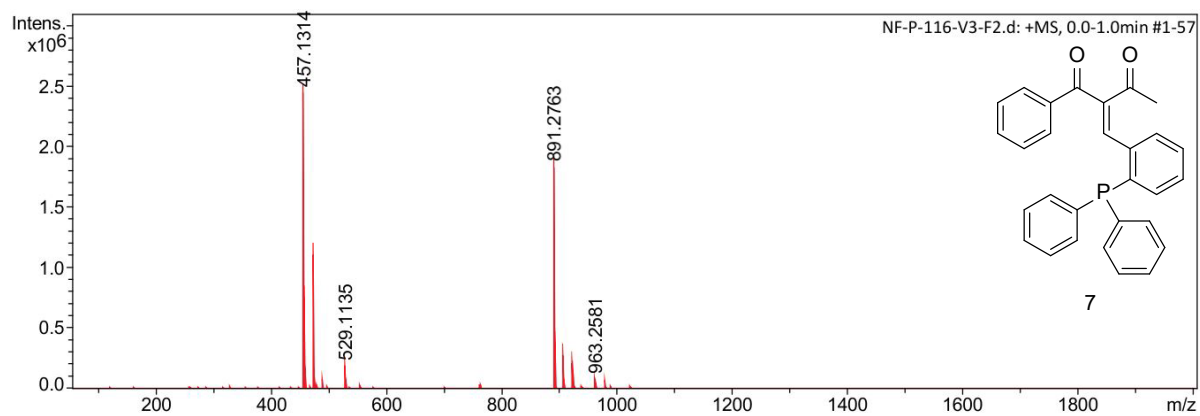

Supplement: s1 [file s1]
